# Supplementary material for: Facile fabrication and photoelectrochemical properties of a CuO nanorod photocathode with a ZnO nanobranch protective layer
Source: Royal Society of Chemistry journal article supplement (doi:10.1039/c6ra18832j), 2016-01-01

## Supporting figures captions

**Fig. S1.** UV-vis absorbance spectra for ZnO thin film and nanorods.

**Fig. S2.** Low (a) and high (b) magnification FE-SEM images of the CuO/ZnO-NR electrode after stability test. Low (c) and high (d) magnification FE-SEM images showing some mechanical damages on the CuO/ZnO-NR electrode

**Fig. S3.** XRD pattern of the Cu/ZnO-NR electrode after stability test. .

### Supporting Figures:

#### Figure S1

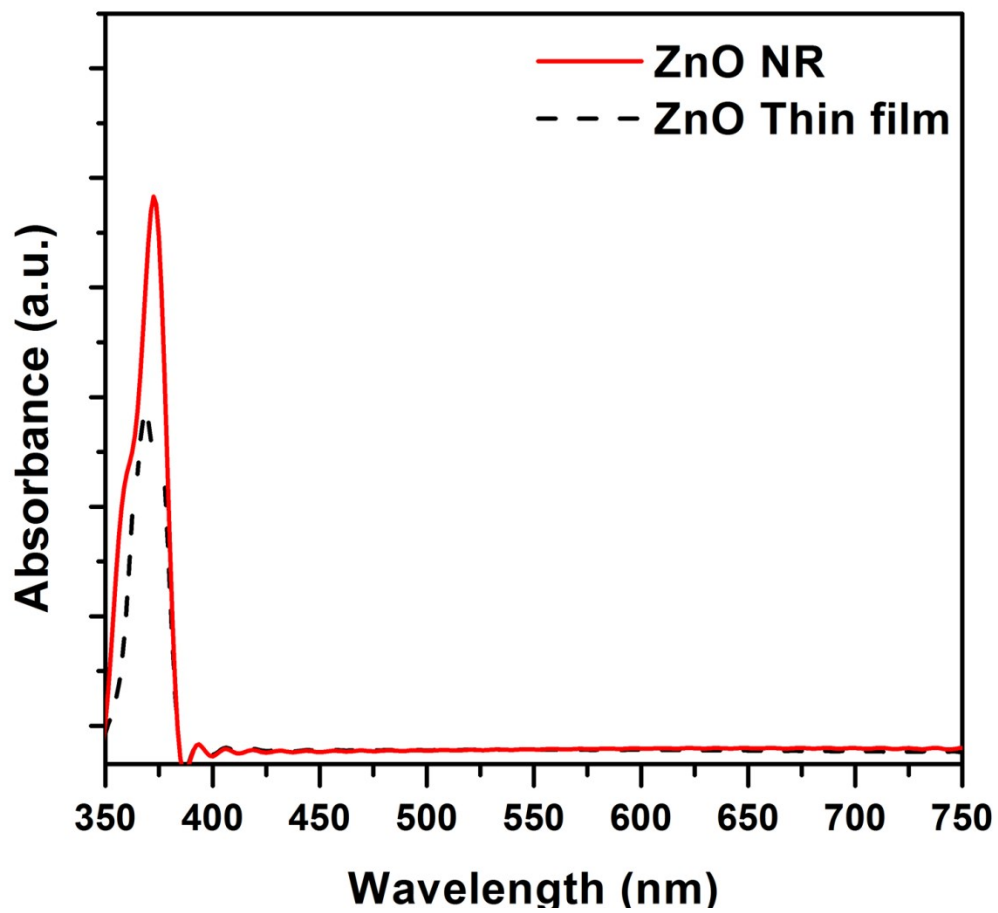

Figure S2

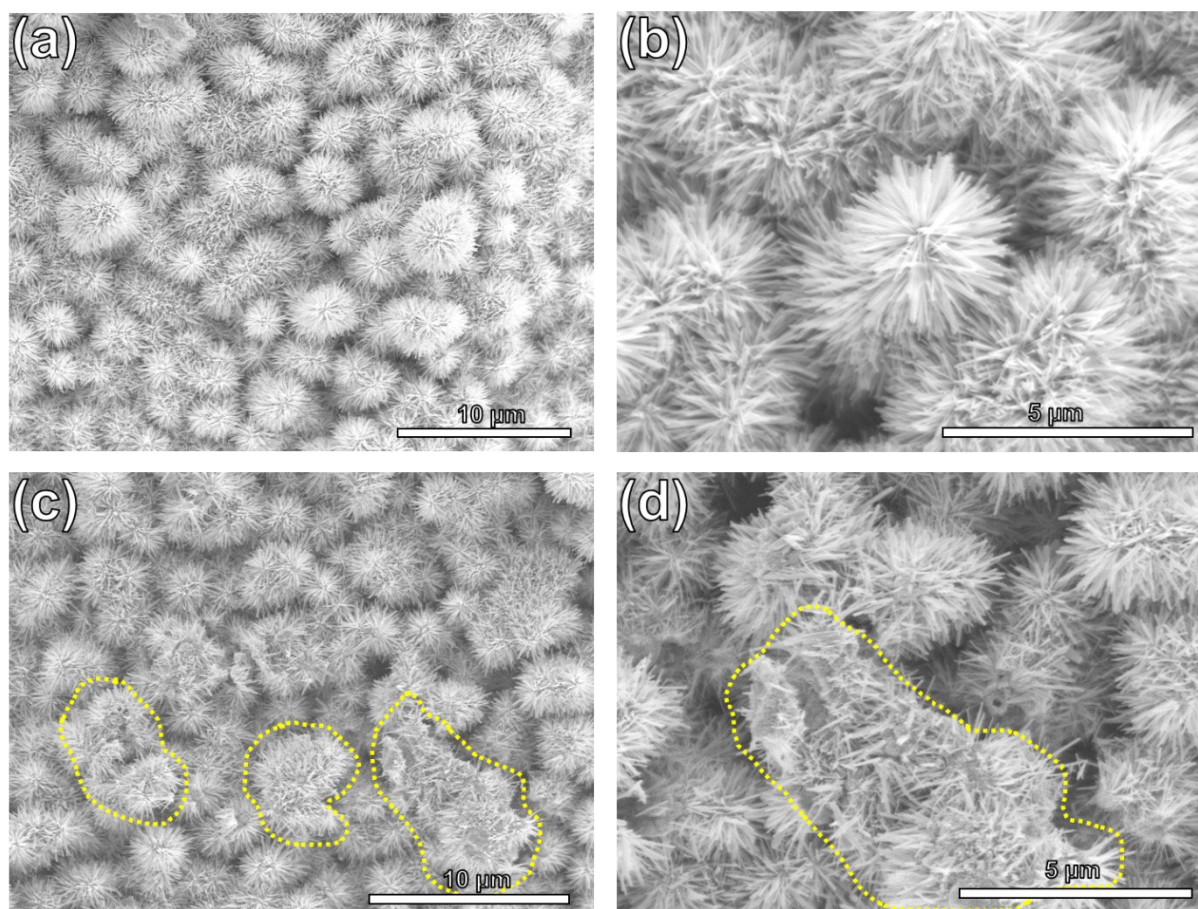

Figure S3

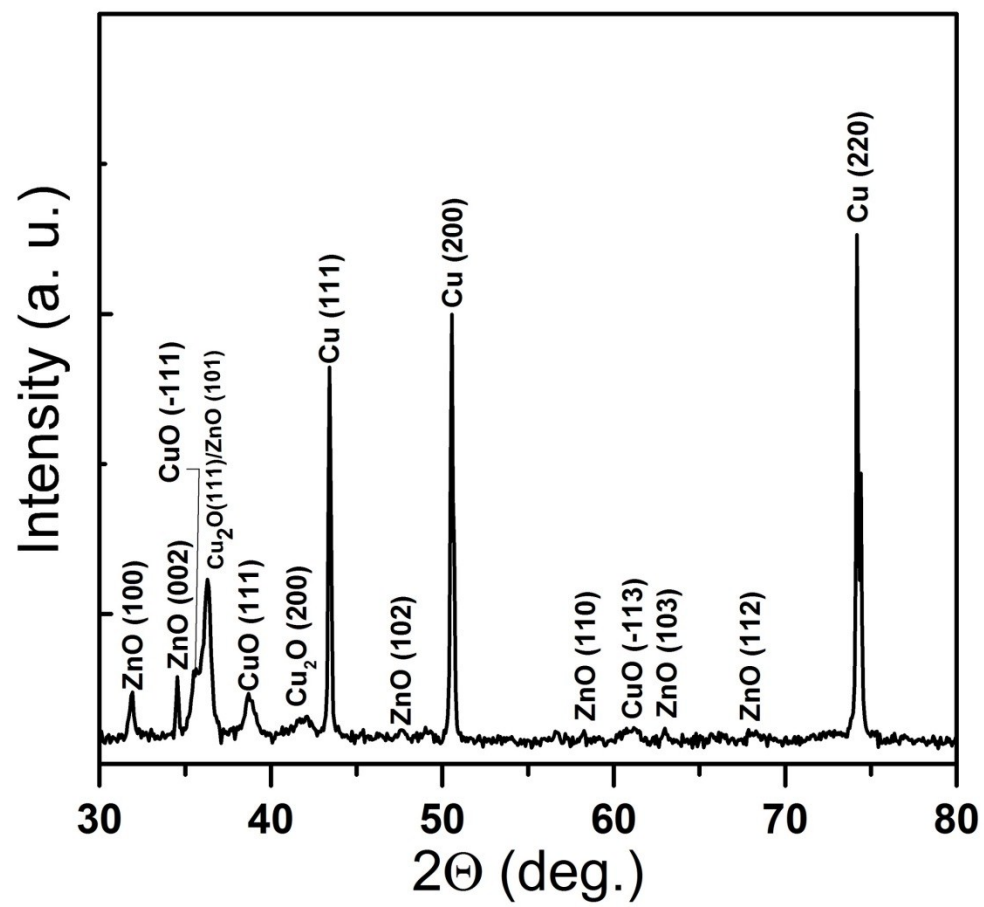

Supplement: c6ra18832j1.pdf [file c6ra18832j1.pdf]
